# Supplementary material for: Review of Over 15 Years Postmarketing Safety Surveillance Spontaneous Data for the Human Rotavirus Vaccine (Rotarix) on Intussusception
Source: PubMed Central journal article supplement — Drug Saf. 2022 Jan 11;45(2):155–68. doi: 10.1007/s40264-021-01141-4 (PMC8894299; doi:10.1007/s40264-021-01141-4), 2022-01-11
Supplement: 40264_2021_1141_MOESM1_ESM.pdf [file 40264_2021_1141_MOESM1_ESM.pdf]

**Review of over 15 years post-marketing safety surveillance spontaneous data for the human rotavirus vaccine (*Rotarix*) on intussusception**

**Journal:** Drug Safety

**Authorship:** Tina Singh<sup>1</sup>, Frédérique Delannois<sup>1</sup>, François Haguinet<sup>1</sup>, Lifeter Yenwo Molo<sup>1</sup>

**Affiliations:**

<sup>1</sup>GSK, Avenue Fleming 20, 1300 Wavre, Belgium

**Corresponding author:**

Tina Singh

[tina.x.singh@gsk.com](mailto:tina.x.singh@gsk.com)

**Electronic supplementary material 1** Incidence rates of intussusception (IS), first year of life, from selected studies or data sources

| Country or region        | Population & methods (Period)                              | Rate /100,000 PY | % surgery (curative) | Total number of IS cases | Reference or data source |
|--------------------------|------------------------------------------------------------|------------------|----------------------|--------------------------|--------------------------|
| <b>Latin America</b>     |                                                            |                  |                      |                          |                          |
| Brazil                   | <i>Prospective hospital-based surveillance (2003–2005)</i> | 3.8              | -                    | ±29                      | [1]                      |
| Costa Rica               | Prospective hospital-based surveillance (2003–2005)        | 18.9             | -                    | ±27                      | [1]                      |
| Nicaragua                | Prospective hospital-based surveillance (2003–2005)        | 19.6             | -                    | ±11                      | [1]                      |
| Peru                     | Prospective hospital-based surveillance (2003–2005)        | 25.1             | -                    | ±40                      | [1]                      |
| Panama                   | Retrospective review discharge (1998–2002)                 | 30               | 68                   | 103                      | [2]                      |
| Honduras                 | Prospective hospital-based surveillance (2003–2005)        | 30.4             | -                    | ±40                      | [1]                      |
| Venezuela                | Hospital data (1998–2001)                                  | 35               | 88                   | 59                       | [3]                      |
| Colombia                 | Prospective hospital-based surveillance (2003–2005)        | 37.4             | -                    | ±37                      | [1]                      |
| Dominican Republic       | Prospective hospital-based surveillance (2003–2005)        | 37.8             | -                    | ±36                      | [1]                      |
| Latin America (+Finland) | Twelve countries (2003–2005)                               | 40.4             | ±84                  | ±350                     | [1]                      |
| Chile                    | Prospective hospital-based surveillance (2003–2005)        | 47.0             | -                    | 57                       | [1]                      |
| Chile                    | HealthCare database of six hospitals (2000–2001)           | 51               | 78                   | 71                       | [4]                      |
| Panama                   | Prospective hospital-based surveillance (2003–2005)        | 69.4             | -                    | 55                       | [1]                      |
| Mexico                   | Prospective hospital-based surveillance (2003–2005)        | 87.8             | -                    | 113                      | [1]                      |
| Argentina                | <i>Prospective hospital-based surveillance</i>             | 105.3            | -                    | ±42                      | [1]                      |

| Country or region  | Population & methods (Period)                                                                                 | Rate /100,000 PY         | % surgery (curative) | Total number of IS cases | Reference or data source |
|--------------------|---------------------------------------------------------------------------------------------------------------|--------------------------|----------------------|--------------------------|--------------------------|
| <i>(2003–2005)</i> |                                                                                                               |                          |                      |                          |                          |
| <b>Asia</b>        |                                                                                                               |                          |                      |                          |                          |
| Malaysia           | Hospital discharge from three hospitals (covering 20% of the population) over a three-year period (2000–2003) | 17.8                     | 17.7                 | 46                       | [5]                      |
| Singapore          | Observational, retrospective hospital-based study; children <1 YoA (2002–2010)                                | 29                       | 20%                  | 98                       | [6]                      |
| Singapore          | Hospitals (1997–2007)                                                                                         | 53.1                     | -                    | 232                      | [7]                      |
| Bahrain            | Medical chart review in one hospital (2004–2006)                                                              | 35.4–56.3                | -                    | 21                       | [8]                      |
| Singapore          | Hospital discharge (1997–2004)                                                                                | 60.3                     | -                    | 194                      | [9]                      |
| Taiwan             | Data from National Insurance Health System (1999–2001)                                                        | 68.4                     | ±31                  | 554                      | [10]                     |
| Kingdom of Bahrain | Retrospective, hospital-based, single-centre (1999–2003)                                                      | 74.2                     | ±29.6                | 44                       | [8]                      |
| Taiwan             | National Health Insurance (1998–2007)                                                                         | 77                       | -                    | ±2,400                   | [11]                     |
| Hong Kong          | Discharge from government hospitals (1997–1999)                                                               | 88.2                     | 23                   | 101                      | [12]                     |
| Israel             | Observational, retrospective, hospital-based study; children <1 YoA (1992–2009)                               | 106                      | 27%                  | 134                      | [13]                     |
| Hong Kong          | A six-year period; ICD-9-CM (1997–2003)                                                                       | 107.5                    | 31                   | 297                      | [14]                     |
| Japan              | <i>Retrospective health claims database study (2005–2011)</i>                                                 | 143.5                    | -                    | 51                       | [15, 16]                 |
| Japan              | Hospital-Based Retrospective Survey (2001–2010)                                                               | 158                      | -                    | 122                      | [17]                     |
| Japan              | <i>Inpatient database analysis (2007–2008)</i>                                                                | 179 (2007)<br>191 (2008) | -                    | 2,427                    | [18]                     |
| Japan              | Hospital records (1978–2002)                                                                                  | 185                      | ±13                  | 41                       | [19]                     |
| Vietnam            | Observational, retrospective and prospective hospital-                                                        | 296                      | 3%                   | 869                      | [20]                     |

| Country or region | Population & methods (Period)                                                                                               | Rate /100,000 PY              | % surgery (curative) | Total number of IS cases | Reference or data source |
|-------------------|-----------------------------------------------------------------------------------------------------------------------------|-------------------------------|----------------------|--------------------------|--------------------------|
| Vietnam           | based study; children <1 YoA (2007–2009)<br>Observational, retrospective, hospital-based study; children <1 YoA (2009–2011) | 296                           | 1%                   | 187                      | [21]                     |
| Vietnam           | Single hospital (2002–2003)                                                                                                 | 302                           | 12                   | 533                      | [22]                     |
| South Korea       | A three-year period; eight medical facilities; ICD-10 (2000–2002)                                                           | 328.3                         | ±21.6                | 214                      | [23]                     |
| <b>Europe</b>     |                                                                                                                             |                               |                      |                          |                          |
| United Kingdom    | Prospective study (2008–2009)                                                                                               | 24.8                          | -                    | 250                      | [24]                     |
| Ireland           | Prospective study (2008–2009)                                                                                               | 24.2                          | -                    | 250                      | [24]                     |
| Germany           | Hospital-based, prospective, multicentre surveillance (2006–2007)                                                           | 26.6                          | -                    | 358                      | [25]                     |
| Netherlands       | Retrospective cohort (2008–2012)                                                                                            | 27.9<br>(primary care)        | -                    | 15                       | [26]                     |
| England           | Retrospective hospital data (2002–2012)                                                                                     | 35 (hospital)<br>28.1         | -                    | 539<br>-                 | [27]                     |
| England           | Retrospective hospital data (2008–2009)                                                                                     | 28.9                          | -                    | 227                      | [28]                     |
|                   | Retrospective hospital and paediatric surveillance unit data (1995–2009)                                                    | 34–86                         |                      | 4,868                    |                          |
| France            | Prospective study (2008–2012)                                                                                               | 29.8 (BCL1)<br>37.5 (BC L1–4) | -                    | 145 (115 BCL1)           | [29]                     |
| Italy             | Hospital data (2002–2012)                                                                                                   | 39                            | -                    | 2,344                    | [30]                     |
| Switzerland       | Surveillance network + capture-recapture adj. (2003–2006)                                                                   | 47.1                          | 23                   | 83                       | [31]                     |
| United Kingdom    | Data on National Health Service Hospitals (1993–1995)                                                                       | 66                            | -                    | 833                      | [32]                     |
| Germany           | Inpatient database analysis (2005–2006)                                                                                     | 72                            | -                    | 518                      | [33]                     |
| Denmark           | Complete birth cohort + hospital discharge                                                                                  | 78.2                          | -                    | 624                      | [34]                     |

| Country or region                  | Population & methods (Period)                                              | Rate /100,000 PY | % surgery (curative) | Total number of IS cases | Reference or data source |
|------------------------------------|----------------------------------------------------------------------------|------------------|----------------------|--------------------------|--------------------------|
| Belgium                            | (1990–2001)<br>Health Insurance; whole country                             | 82               | -                    | 672                      | Unpublished work         |
| Germany                            | (2000–2006)<br><i>Federal Health statistics; whole country (2000–2005)</i> | 96.7             | -                    | 665/year                 | <i>Unpublished work</i>  |
| <b>North America</b>               |                                                                            |                  |                      |                          |                          |
| Canada                             | Retropective hospital data (1995–2010)                                     | 29 (2010)        | -                    | -                        | [35]                     |
| US                                 | <i>DTaP; claims database (2001–2005)</i>                                   | 33               | -                    | 22                       | [36]                     |
| US                                 | Hospitalisations; claims database (1993–2004)                              | 34               | 51 (2002–2004)       | ±10,000                  | [37]                     |
| US                                 | Retrospective hospital data (2000–2005)                                    | 35.9             | ±50                  | ±6,300                   | [38]                     |
| US (Ohio, Tennessee, and New York) | Hospitals database (2001–2006)                                             | 49.3             | 37.2                 | 156                      | [39]                     |
| <i>New York</i>                    | <i>Hospital discharge data (1989–1998)</i>                                 | 54               | 50.6                 | 1,450                    | [40]                     |
| <b>Africa</b>                      |                                                                            |                  |                      |                          |                          |
| South Africa                       | Retrospective study; <2 YoA (1998–2003)                                    | 31               | -                    | 346                      | [41]                     |
| Tunisia                            | Retrospective study (1984–2003)                                            | 62               | ±28                  | 416                      | [42]                     |
| Zambia                             | Retrospective and prospective study; <2 YoA (2007–2012)                    | 61               | -                    | 105                      | [41]                     |
| <b>Oceania</b>                     |                                                                            |                  |                      |                          |                          |
| New Zealand                        | Retrospective hospital data (1998–2013)                                    | 56.1             | -                    | 531                      | [43]                     |
|                                    | (1998–2003)                                                                | 58.9             |                      | 181                      |                          |
|                                    | (2003–2013)                                                                | 54.8             |                      | 350                      |                          |
| New Zealand                        | All public hospitals (1998–2003)                                           | 65               | -                    | 200                      | [44]                     |
| Australia                          | Single hospital (2002–2004)                                                | 71               | 8                    | 51                       | [22]                     |
| Australia                          | Hospitals, nationwide (1994–2000)                                          | 101              | -                    | 3,274                    | [45]                     |

BCL, Brighton Collaboration Working Group level; DTaP, diphtheria, tetanus, and acellular pertussis; ESPED, German Paediatric Surveillance Unit; ICD-9-CM, International Classification of Diseases, Ninth Revision, Clinical Modification;

ICD-10, International Classification of Diseases, Tenth Revision; OPS, Operation and Procedure Classification System; PY, person years; US, United States; YoA, years of age.

The data in this table were collected during a literature search and were used to establish background incidence rates. Italic text indicates studies including the minimum and maximum values of the background incidence range.

## References

1. Sáez-Llorens X, Velázquez FR, Lopez P, Espinoza F, Linhares AC, Abate H et al. A multi-country study of intussusception in children under 2 years of age in Latin America: analysis of prospective surveillance data. BMC Gastroenterol. 2013; <https://doi.org/10.1186/1471-230x-13-95>
2. Saez-Llorens X, Guevara JN. Intussusception and rotavirus vaccines: what is the background risk? Pediatr Infect Dis J. 2004; <https://doi.org/10.1097/00006454-200404000-00020>
3. Perez-Schael I, Escalona M, Salinas B, Materan M, Perez ME, Gonzalez G. Intussusception-associated hospitalization among Venezuelan infants during 1998 through 2001: anticipating rotavirus vaccines. Pediatr Infect Dis J. 2003; <https://doi.org/10.1097/01.inf.0000055064.76457.f3>
4. O'Ryan M, Lucero Y, Pena A, Valenzuela MT. Two year review of intestinal intussusception in six large public hospitals of Santiago, Chile. Pediatr Infect Dis J. 2003; <https://doi.org/10.1097/01.inf.0000078374.82903.e8>
5. Giak CL, Singh HS, Nallusamy R, Leong TY, Ng TL, Bock HL. Epidemiology of intussusception in Malaysia: a three-year review. Southeast Asian J Trop Med Public Health. 2008; 39:848-855.
6. Phua KB, Lee BW, Quak SH, Jacobsen A, Teo H, Vadivelu-Pechai K et al. Incidence of intussusception in Singaporean children aged less than 2 years: a hospital-based prospective study. BMC Pediatr. 2013; <https://doi.org/10.1186/1471-2431-13-161>

7. Tan N, Teoh YL, Phua KB, Quak SH, Lee BW, Teo HJ et al. An update of paediatric intussusception incidence in Singapore: 1997-2007, 11 years of intussusception surveillance. *Ann Acad Med Singap.* 2009; 38:690-692.
8. Al Musawi M, Alhindi SJ, Anis S, Pawinski R. Incidence of intussusception in children less than 2 years. *Bahrain Med Bull.* 2012; 34:1-9.
9. Boudville IC, Phua KB, Quak SH, Lee BW, Han HH, Verstraeten T et al. The epidemiology of paediatric intussusception in Singapore: 1997 to 2004. *Ann Acad Med Singap.* 2006; 35:674-679.
10. Ho WL, Yang TW, Chi WC, Chang HJ, Huang LM, Chang MH. Intussusception in Taiwanese children: analysis of incidence, length of hospitalization and hospital costs in different age groups. *J Formos Med Assoc.* 2005; 104:398-401.
11. Chen SC, Wang JD, Hsu HY, Leong MM, Tok TS, Chin YY. Epidemiology of childhood intussusception and determinants of recurrence and operation: analysis of national health insurance data between 1998 and 2007 in Taiwan. *Pediatr Neonatol.* 2010; [https://doi.org/10.1016/s1875-9572\(10\)60055-1](https://doi.org/10.1016/s1875-9572(10)60055-1)
12. Nelson EA, Tam JS, Glass RI, Parashar UD, Fok TF. Incidence of rotavirus diarrhea and intussusception in Hong Kong using standardized hospital discharge data. *Pediatr Infect Dis J.* 2002; <https://doi.org/10.1097/00006454-200207000-00019>
13. Muhsen K, Kassem E, Efraim S, Goren S, Cohen D, Ephros M. Incidence and risk factors for intussusception among children in northern Israel from 1992 to 2009: a retrospective study. *BMC Pediatr.* 2014; <https://doi.org/10.1186/1471-2431-14-218>
14. Hong Kong Intussusception Study Group. Intussusception trends in Hong Kong children. *Hong Kong Med J.* 2007; 13:279-283.
15. Clinicaltrials.gov. Study on the incidence of intussusception (IS) in children aged <12 months in Japan. 2012. <https://clinicaltrials.gov/ct2/show/NCT01479491>. Accessed 29 November 2021.

16. GSK study register. Study on the incidence of intussusception (IS) in children aged <12 months in Japan. <https://www.gsk-studyregister.com/en/trial-details/?id=116259>. Accessed 29 November 2021.
17. Noguchi A, Nakagomi T, Kimura S, Takahashi Y, Matsuno K, Koizumi H et al. Incidence of intussusception as studied from a hospital-based retrospective survey over a 10-year period (2001-2010) in Akita Prefecture, Japan. *Jpn J Infect Dis.* 2012; <https://doi.org/10.7883/yoken.65.301>
18. Takeuchi M, Osamura T, Yasunaga H, Horiguchi H, Hashimoto H, Matsuda S. Intussusception among Japanese children: an epidemiologic study using an administrative database. *BMC Pediatr.* 2012; <https://doi.org/10.1186/1471-2431-12-36>
19. Nakagomi T, Takahashi Y, Arisawa K, Nakagomi O. A high incidence of intussusception in Japan as studied in a sentinel hospital over a 25-year period (1978-2002). *Epidemiol Infect.* 2006; <https://doi.org/10.1017/S0950268805004644>
20. Van Trang N, Le Nguyen NT, Dao HT, Ho VL, Tran DT, Loewen J et al. Incidence and Epidemiology of Intussusception among Infants in Ho Chi Minh City, Vietnam. *J Pediatr.* 2014; <https://doi.org/10.1016/j.jpeds.2013.10.006>
21. Tran LA, Yoshida LM, Nakagomi T, Gauchan P, Ariyoshi K, Anh DD et al. A High Incidence of Intussusception Revealed by a Retrospective Hospital-Based Study in Nha Trang, Vietnam between 2009 and 2011. *Trop Med Health.* 2013; <https://doi.org/10.2149/tmh.2013-09>
22. Bines JE, Liem NT, Justice FA, Son TN, Kirkwood CD, de Campo M et al. Risk factors for intussusception in infants in Vietnam and Australia: adenovirus implicated, but not rotavirus. *J Pediatr.* 2006; <https://doi.org/10.1016/j.jpeds.2006.04.010>
23. Jo DS, Nyambat B, Kim JS, Jang YT, Ng TL, Bock HL et al. Population-based incidence and burden of childhood intussusception in Jeonbuk Province, South Korea. *Int J Infect Dis.* 2009; <https://doi.org/10.1016/j.ijid.2009.01.011>



24. Samad L, Cortina-Borja M, Bashir HE, Sutcliffe AG, Marven S, Cameron JC et al. Intussusception incidence among infants in the UK and Republic of Ireland: a pre-rotavirus vaccine prospective surveillance study. *Vaccine*. 2013; <https://doi.org/10.1016/j.vaccine.2013.06.084>
25. Bissantz N, Jenke AC, Trampisch M, Klaassen-Mielke R, Bissantz K, Trampisch HJ et al. Hospital-based, prospective, multicentre surveillance to determine the incidence of intussusception in children aged below 15 years in Germany. *BMC gastroenterology*. 2011; <https://doi.org/10.1186/1471-230X-11-26>
26. Gadroen K, Kemmeren JM, Bruijning-Verhagen PC, Straus SM, Weibel D, de Melker HE et al. Baseline incidence of intussusception in early childhood before rotavirus vaccine introduction, the Netherlands, January 2008 to December 2012. *Euro Surveill*. 2017; <https://doi.org/10.2807/1560-7917.ES.2017.22.25.30556>
27. Clark A, Jit M, Andrews N, Atchison C, Edmunds WJ, Sanderson C. Evaluating the potential risks and benefits of infant rotavirus vaccination in England. *Vaccine*. 2014; <https://doi.org/10.1016/j.vaccine.2014.04.082>
28. Samad L, Cortina-Borja M, Sutcliffe AG, Marven S, Cameron JC, El Bashir H et al. National hospital data for intussusception: Data linkage and retrospective analysis to assess quality and use in vaccine safety surveillance. *Vaccine*. 2016; <https://doi.org/10.1016/j.vaccine.2015.11.041>
29. Fotso Kamdem A, Vidal C, Pazart L, Leroux F, Pugin A, Savet C et al. Incidence of acute intussusception among infants in eastern France: results of the EPIstudy trial. *Eur J Pediatr*. 2017; <https://doi.org/10.1007/s00431-016-2838-z>
30. Trotta F, Da Cas R, Bella A, Santuccio C, Salmaso S. Intussusception hospitalizations incidence in the pediatric population in Italy: a nationwide cross-sectional study. *Ital J Pediatr*. 2016; <https://doi.org/10.1186/s13052-016-0298-8>

31. Buettcher M, Baer G, Bonhoeffer J, Schaad UB, Heininger U. Three-year surveillance of intussusception in children in Switzerland. *Pediatrics*. 2007; <https://doi.org/10.1542/peds.2007-0035>
32. Gay N, Ramsay M, Waight P. Rotavirus vaccination and intussusception. *Lancet*. 1999; [https://doi.org/10.1016/S0140-6736\(05\)75710-X](https://doi.org/10.1016/S0140-6736(05)75710-X)
33. Kohl LJ, Streng A, Grote V, Koletzko S, Liese JG. Intussusception-associated hospitalisations in southern Germany. *Eur J Pediatr*. 2010; <https://doi.org/10.1007/s00431-010-1248-x>
34. Fischer TK, Bihrmann K, Perch M, Koch A, Wohlfahrt J, Kare M et al. Intussusception in early childhood: a cohort study of 1.7 million children. *Pediatrics*. 2004; <https://doi.org/10.1542/peds.2004-0390>
35. Ducharme R, Benchimol EI, Deeks SL, Hawken S, Fergusson DA, Wilson K. Validation of diagnostic codes for intussusception and quantification of childhood intussusception incidence in Ontario, Canada: a population-based study. *J Pediatr*. 2013; <https://doi.org/10.1016/j.jpeds.2013.05.034>
36. Eng PM, Mast TC, Loughlin J, Clifford CR, Wong J, Seeger JD. Incidence of intussusception among infants in a large commercially insured population in the United States. *Pediatr Infect Dis J*. 2012; <https://doi.org/10.1097/inf.0b013e31824213b1>
37. Tate JE, Simonsen L, Viboud C, Steiner C, Patel MM, Curns AT et al. Trends in intussusception hospitalizations among US infants, 1993-2004: implications for monitoring the safety of the new rotavirus vaccination program. *Pediatrics*. 2008; <https://doi.org/10.1542/peds.2007-1590>
38. Tate JE, Yen C, Steiner CA, Cortese MM, Parashar UD. Intussusception rates before and after the introduction of rotavirus vaccine. *Pediatrics*. 2016; <https://doi.org/10.1542/peds.2016-1082>

39. Cortese MM, Staat MA, Weinberg GA, Edwards K, Rice MA, Szilagyi PG et al. Underestimates of intussusception rates among US infants based on inpatient discharge data: implications for monitoring the safety of rotavirus vaccines. *J Infect Dis.* 2009; <https://doi.org/10.1086/605055>
40. Chang HG, Smith PF, Ackelsberg J, Morse DL, Glass RI. Intussusception, rotavirus diarrhea, and rotavirus vaccine use among children in New York state. *Pediatrics.* 2001; <https://doi.org/10.1542/peds.108.1.54>
41. Mpabalwani EM, Mwenda JM, Tate JE, Parashar UD. Review of Naturally occurring intussusception in young children in the WHO African region prior to the era of rotavirus vaccine utilization in the expanded programme of immunization. *J Trop Pediatr.* 2017; <https://doi.org/10.1093/tropej/fmw069>
42. Chouikha A, Fodha I, Maazoun K, Ben Brahim M, Hidouri S, Nouri A et al. Rotavirus infection and intussusception in Tunisian children: implications for use of attenuated rotavirus vaccines. *J Pediatr Surg.* 2009; <https://doi.org/10.1016/j.jpedsurg.2009.05.003>
43. Rosie B, Dalziel S, Wilson E, Best EJ. Epidemiology of intussusception in New Zealand pre-rotavirus vaccination. *N Z Med J.* 2016; 129:36-45.
44. Chen YE, Beasley S, Grimwood K, New Zealand Rotavirus Study G. Intussusception and rotavirus associated hospitalisation in New Zealand. *Arch Dis Child.* 2005; <https://doi.org/10.1136/adc.2005.074104>
45. Justice F, Carlin J, Bines J. Changing epidemiology of intussusception in Australia. *J Paediatr Child Health.* 2005; <https://doi.org/10.1111/j.1440-1754.2005.00686.x>
