# Supplementary material for: Review of Over 15 Years Postmarketing Safety Surveillance Spontaneous Data for the Human Rotavirus Vaccine (Rotarix) on Intussusception
Source: PubMed Central journal article supplement — Drug Saf. 2022 Jan 11;45(2):155–68. doi: 10.1007/s40264-021-01141-4 (PMC8894299; doi:10.1007/s40264-021-01141-4), 2022-01-11
Supplement: 40264_2021_1141_MOESM8_ESM.pdf [file 40264_2021_1141_MOESM8_ESM.pdf]

**Review of over 15 years post-marketing safety surveillance spontaneous data for the human rotavirus vaccine (*Rotarix*) on intussusception**

**Journal:** Drug Safety

**Authorship:** Tina Singh<sup>1</sup>, Frédérique Delannois<sup>1</sup>, François Haguinet<sup>1</sup>, Lifeter Yenwo Molo<sup>1</sup>

**Affiliations:**

<sup>1</sup>GSK, Avenue Fleming 20, 1300 Wavre, Belgium

**Corresponding author:**

Tina Singh

[tina.x.singh@gsk.com](mailto:tina.x.singh@gsk.com)

**Electronic supplementary material 8** Significance area for the equality test of observed and expected incidences within (a) 30 days (day 0–day 29) and (b) 7 days (day 0–day 6) after the first dose, and within (c) 30 days (day 0–day 29) and (d) 7 days (day 0–day 6) after any dose according to the reported fraction of events, worldwide

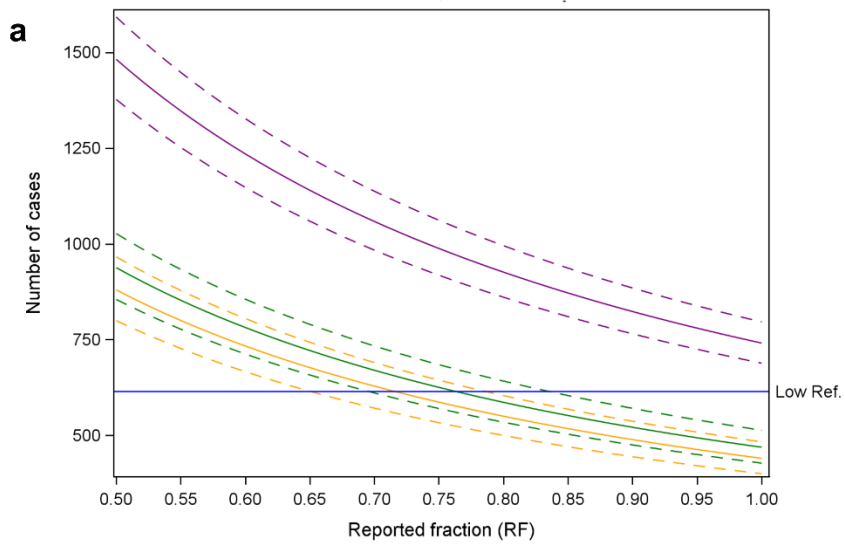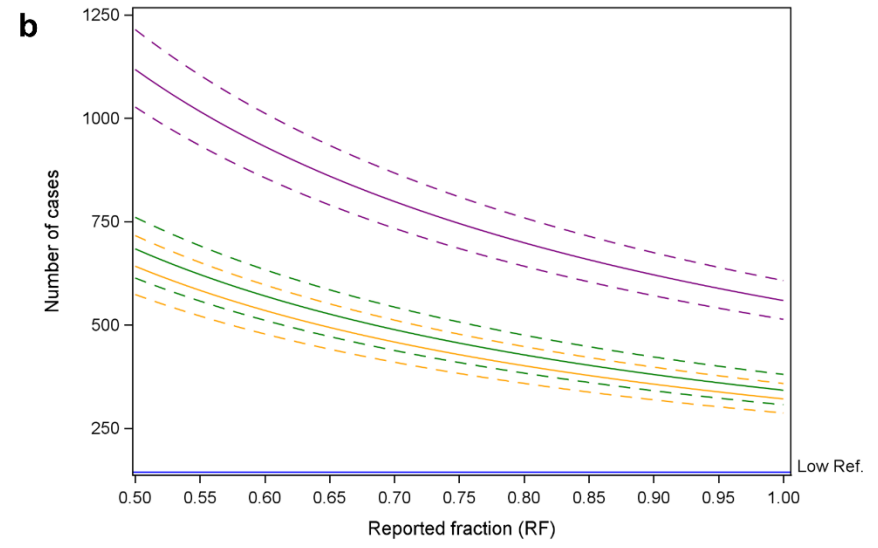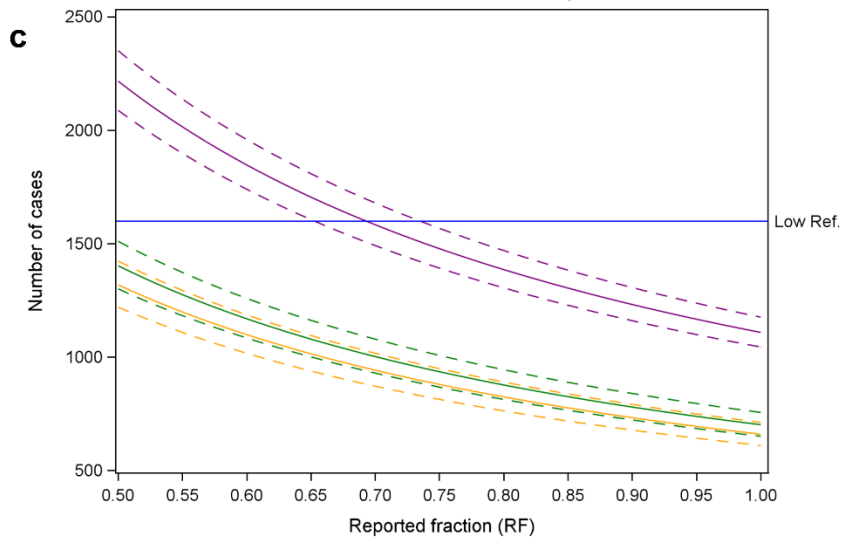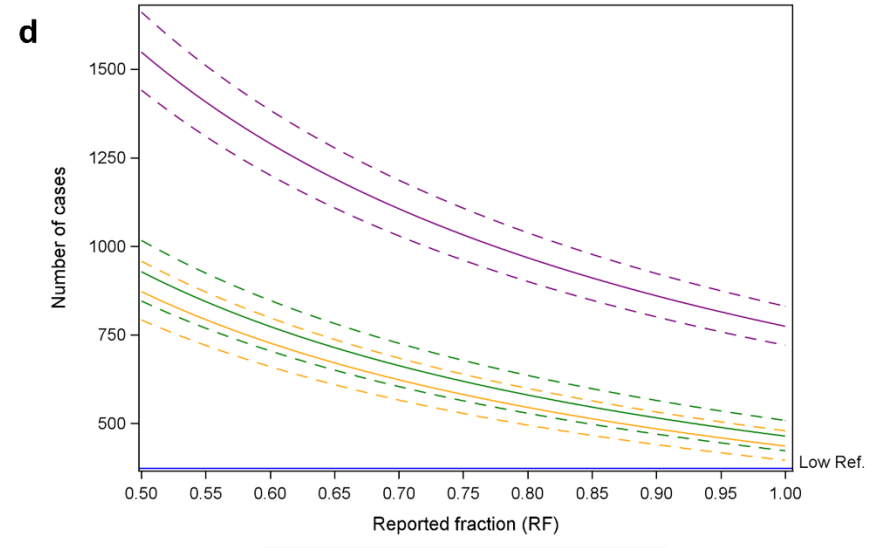

— BCL1    — BCL3  
— BCL4    — Expected    - - - 95%CI

— BCL1    — BCL3  
— BCL4    — Expected    - - - 95%CI

BCL1, Brighton Collaboration Working Group level 1; BCL3, Brighton Collaboration Working Group levels 1–3; BCL4, Brighton Collaboration Working Group levels 1–4; Low Ref. – High Ref., range of expected cases according to background incidence rates (high ref is out of scale on all panels); 95% CI, 95 percent confidence interval. Total number of doses was 319,695,721 for panels a and b (after first dose) and 639,391,442 for panels c and d (after any dose).
